# Supplementary material
Source: PubMed Central journal article supplement (PMC6594158)
Supplement: NIHMS1036131-supplement-Materials_list.pdf [file NIHMS1036131-supplement-Materials_list.pdf]

Materials List for:

## Monitoring Neuronal Survival *Via* Single-cell Longitudinal Fluorescence Microscopy

Kaitlin Weskamp<sup>1</sup>, Nathaniel Safren<sup>1</sup>, Roberto Miguez<sup>1</sup>, Sami Barmada<sup>1</sup>

<sup>1</sup>

Correspondence to: Sami Barmada at [sbarmada@umich.edu](mailto:sbarmada@umich.edu)

URL: <https://www.jove.com/video/59036>

DOI: [doi:10.3791/59036](https://doi.org/10.3791/59036)

### Materials

| Name                           | Company       | Catalog Number | Comments |
|--------------------------------|---------------|----------------|----------|
| Neurobasal Medium              | GIBCO         | 21103-049      |          |
| Opti-MEM                       | GIBCO         | 31985-070      |          |
| CompactPrep Plasmid Maxi Kit   | Qiagen        | 12863          |          |
| Magnesium chloride Hexahydrate | Sigma         | M9272          |          |
| Kynurenic Acid Hydrate         | TCI           | H0303          |          |
| Poly D-Lysine                  | Millipore     | A-003-E        |          |
| Glutamax                       | GIBCO         | 35050-061      |          |
| Lipofectamine 2000             | Invitrogen    | 52887          |          |
| B27 supplement                 | Thermo Fisher | A3582801       |          |
| Penicillin Streptomycin        | GIBCO         | 15140122       |          |
| 96 well plates                 | TPP           | 0876           |          |
